# Supplementary material for: Giardia duodenalis in Wildlife: Exploring Genotype Diversity in Italy and across Europe
Source: MDPI journal article supplement (doi:10.3390/pathogens11010105), 2022-01-16
Supplement: s1 [file s1]

**Table S1.** Haplotype analysis, polymorphic sites analysis and Tajima's D test estimation performed by DnaSP v.6 software for *gdh*, *bg* and *tpi* loci.  $\Pi$  indicates the nucleotide diversity (average number of nucleotide substitutions between all unique pairwise comparisons of sequences); S indicates the number of segregating sites. The asterisks show significance of Tajima's D test values, where \* is equal to not significant ( $P > 0.10$  or  $0.10 > P > 0.05$ ).

| Gene       | N. of haplotypes | Hd (Haplotype diversity) | $\pi$<br>(Nucleotide diversity) | S<br>(N. segregating sites) | Tajima's D |
|------------|------------------|--------------------------|---------------------------------|-----------------------------|------------|
| <i>gdh</i> | 9                | 0.8246                   | 0.05205                         | 33                          | -0.56486*  |
| <i>bg</i>  | 16               | 0.8234                   | 0.04675                         | 29                          | 0.72639*   |
| <i>tpi</i> | 14               | 0.8312                   | 0.12852                         | 145                         | 1.98090 *  |

**Table S2.** *Gdh* locus haplotype analysis; \* indicates the presence of different haplotypes generated from a single ambiguous (double peaks) sequence retrieved from a single isolate; \*\* indicates present study isolates.

| HAPLOTYPE  | N. OF SEQUENCES | HOST (N)                                                                                                       | ASSEMBLAGE DETECTED | AREA                              |
|------------|-----------------|----------------------------------------------------------------------------------------------------------------|---------------------|-----------------------------------|
| <i>hp1</i> | 1               | <i>R. rattus</i> (1)                                                                                           | G                   | Canary Islands                    |
| <i>hp2</i> | 1               | <i>R. rattus</i> (1)                                                                                           | B                   | Canary Islands                    |
| <i>hp3</i> | 1               | <i>R. rattus</i> (1)                                                                                           | G                   | Canary Islands                    |
| <i>hp4</i> | 5               | <i>C. elaphus</i> (2);<br><i>R. r. rupicapra</i> (1)**;<br><i>R. p. ornata</i> (1);<br><i>C. capreolus</i> (1) | A                   | Poland, Italy,<br>The Netherlands |
| <i>hp5</i> | 5               | <i>C. capreolus</i> (2);<br><i>R. r. rupicapra</i> (1);<br><i>S. scrofa</i> (1)**; <i>D. dama</i> (1)          | A                   | Poland, Italy,<br>Sweden          |
| <i>hp6</i> | 9               | <i>D. dama</i> (8); <i>S. scrofa</i> (1)                                                                       | A                   | Italy, Croatia                    |
| <i>hp7</i> | 2               | <i>C. lupus</i> (1);<br><i>N. procyonoides</i> (1)                                                             | D                   | Romania                           |
| <i>hp8</i> | 1               | <i>D. dama</i> ( 1)                                                                                            | E                   | Romania                           |
| <i>hp9</i> | 1               | <i>D. dama</i> (1)                                                                                             | E                   | Sweden                            |

**Table S3.** *Bg* locus haplotype analysis; \* indicates the presence of different haplotypes generated from a single ambiguous (double peaks) sequence retrieved from a single isolate; \*\* indicates present study isolates.

| HAPLOTYPE   | N. OF SEQUENCES | HOST (N)                                                                                                               | ASSEMBLAGE DETECTED | AREA                             |
|-------------|-----------------|------------------------------------------------------------------------------------------------------------------------|---------------------|----------------------------------|
| <i>hp1</i>  | 2               | <i>R. rattus</i> (2)                                                                                                   | G                   | Canary Islands                   |
| <i>hp2</i>  | 1               | <i>R. rattus</i> (1)                                                                                                   | G                   | Canary Islands                   |
| <i>hp3</i>  | 1               | <i>R. rattus</i> (1)                                                                                                   | G                   | Canary Islands                   |
| <i>hp4</i>  | 1               | <i>R. rattus</i> (1)                                                                                                   | B                   | Canary Islands                   |
| <i>hp5</i>  | 13              | <i>C. elaphus</i> (3); <i>A. alces</i> (2);<br><i>D. dama</i> (8)                                                      | A                   | Poland, Norway,<br>Italy         |
| <i>hp6</i>  | 16              | <i>F. silvestris</i> (1); <i>S. scrofa</i> (5); <i>C. capreolus</i> (3);<br><i>C. elaphus</i> (4); <i>P. lotor</i> (3) | B                   | Luxembourg,<br>Poland, Germany   |
| <i>hp7</i>  | 2               | <i>S. scrofa</i> (1);<br><i>C. capreolus</i> (1)                                                                       | B                   | Poland                           |
| <i>hp8</i>  | 1               | <i>C. capreolus</i> (1);                                                                                               | B                   | Poland                           |
| <i>hp9</i>  | 3               | <i>C. lupus</i> (1);<br><i>N. procyonoides</i> (1);<br><i>S. scrofa</i> (1)**                                          | D                   | Poland, Italy                    |
| <i>hp10</i> | 20              | <i>C. capreolus</i> (8);<br><i>D. dama</i> (1); <i>V. vulpes</i> (1);<br><i>R. tarandus</i> (6); <i>A. alces</i> (4)   | A                   | Poland, Sweden,<br>Norway, Spain |
| <i>hp11</i> | 1               | <i>R. norvegicus</i> (1)                                                                                               | G                   | Sweden                           |
| <i>hp12</i> | 5*              | <i>H. cristata</i> (5)*, **                                                                                            | B                   | Italy                            |
| <i>hp13</i> | 1*              | <i>H. cristata</i> (1)*, **                                                                                            | B                   | Italy                            |
| <i>hp14</i> | 1*              | <i>H. cristata</i> (1)*, **                                                                                            | B                   | Italy                            |
| <i>hp15</i> | 1*              | <i>H. cristata</i> (1)*, **                                                                                            | B                   | Italy                            |
| <i>hp16</i> | 3               | <i>S. scrofa</i> (2)**;<br><i>R. r. rupicapra</i> (1)**                                                                | A                   | Italy                            |

**Table S4.** *Tpi* locus haplotype analysis; \* indicates the presence of different haplotypes generated from a single ambiguous (double peaks) sequence retrieved from a single isolate; \*\* indicates present study isolates.

| HAPLOTYPE   | N. OF SEQUENCES | HOST(N)                                         | ASSEMBLAGE DETECTED | AREA                      |
|-------------|-----------------|-------------------------------------------------|---------------------|---------------------------|
| <i>hp1</i>  | 10              | <i>C. elaphus</i> (2);<br><i>D. dama</i> (8)    | A                   | Poland, Italy             |
| <i>hp2</i>  | 5*              | <i>R. rattus</i> (1);<br><i>V. vulpes</i> (4)*  | B                   | Canary Islands,<br>Sweden |
| <i>hp3</i>  | 1               | <i>S. scrofa</i> (1)**                          | A                   | Italy                     |
| <i>hp4</i>  | 1               | <i>H. cristata</i> (1)**                        | B                   | Italy                     |
| <i>hp5</i>  | 1               | <i>H. cristata</i> (1)**                        | B                   | Italy                     |
| <i>hp6</i>  | 1               | <i>C. a. moreoticus</i> (1)                     | B                   | Croatia                   |
| <i>hp7</i>  | 1*              | <i>V. vulpes</i> (1)*                           | B                   | Sweden                    |
| <i>hp8</i>  | 1               | <i>C. elaphus</i> (1)                           | A                   | Croatia                   |
| <i>hp9</i>  | 1               | <i>R. norvegicus</i> (1)                        | G                   | Sweden                    |
| <i>hp10</i> | 1               | <i>D. dama</i> (1)                              | A                   | Sweden                    |
| <i>hp11</i> | 1               | <i>D. dama</i> (1)                              | E                   | Sweden                    |
| <i>hp12</i> | 1               | <i>H. cristata</i> (1)**                        | A                   | Italy                     |
| <i>hp13</i> | 11              | <i>R. rattus</i> (8);<br><i>M. musculus</i> (3) | G                   | Canary Islands            |
| <i>hp14</i> | 3               | <i>R. rattus</i> (2);<br><i>M. musculus</i> (1) | G                   | Canary Islands            |
